# Supplementary material for: Photoinduced dynamics in cycloparaphenylenes: planarization, electron–phonon coupling, localization and intra-ring migration of the electronic excitation
Source: Royal Society of Chemistry journal article supplement (doi:10.1039/c7cp06426h), 2017-01-01

**Figure S1.** Simulated absorption and emission spectra for [n]CPP (n=12,15,16) at 300K and 10K with separated contributions of different excited states to the absorption spectrum.

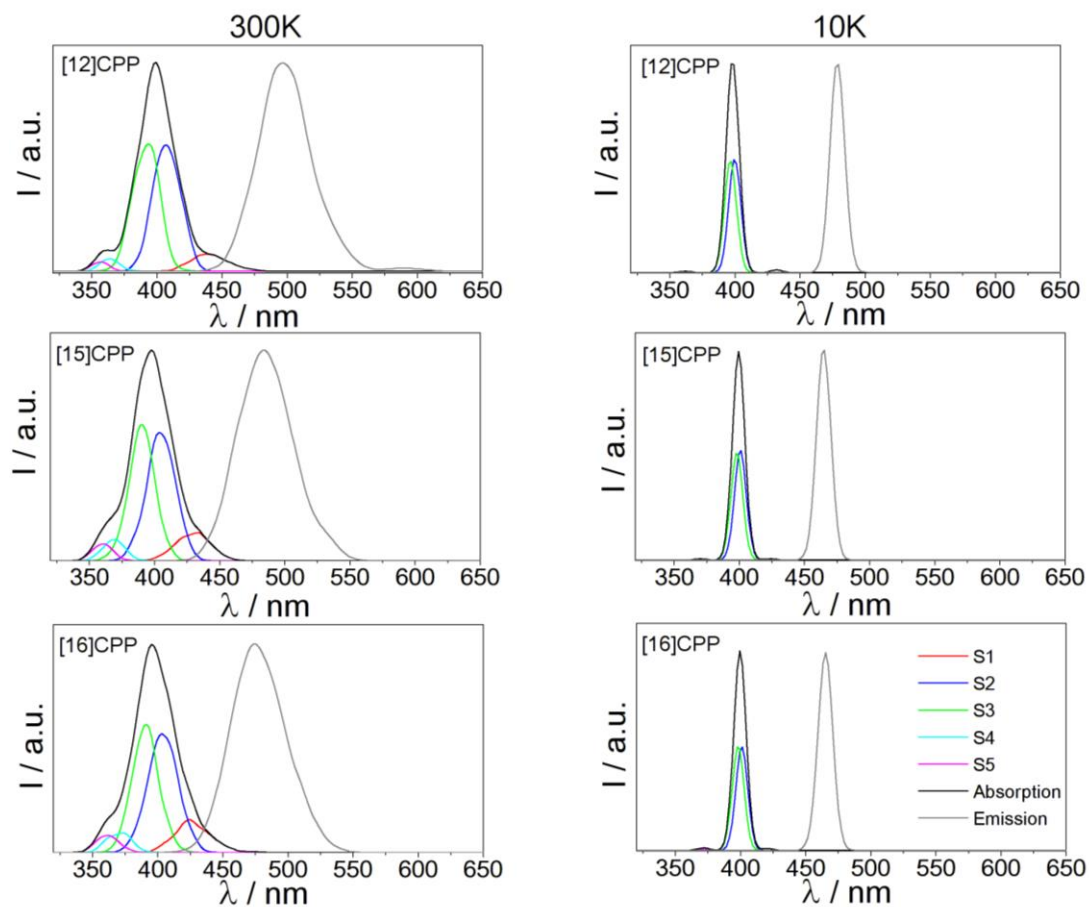

**Figure S2.** Dihedral angle distributions at the initial ground state configurations spectra for [n]CPP (n=12,15,16) at 300K and 10K.

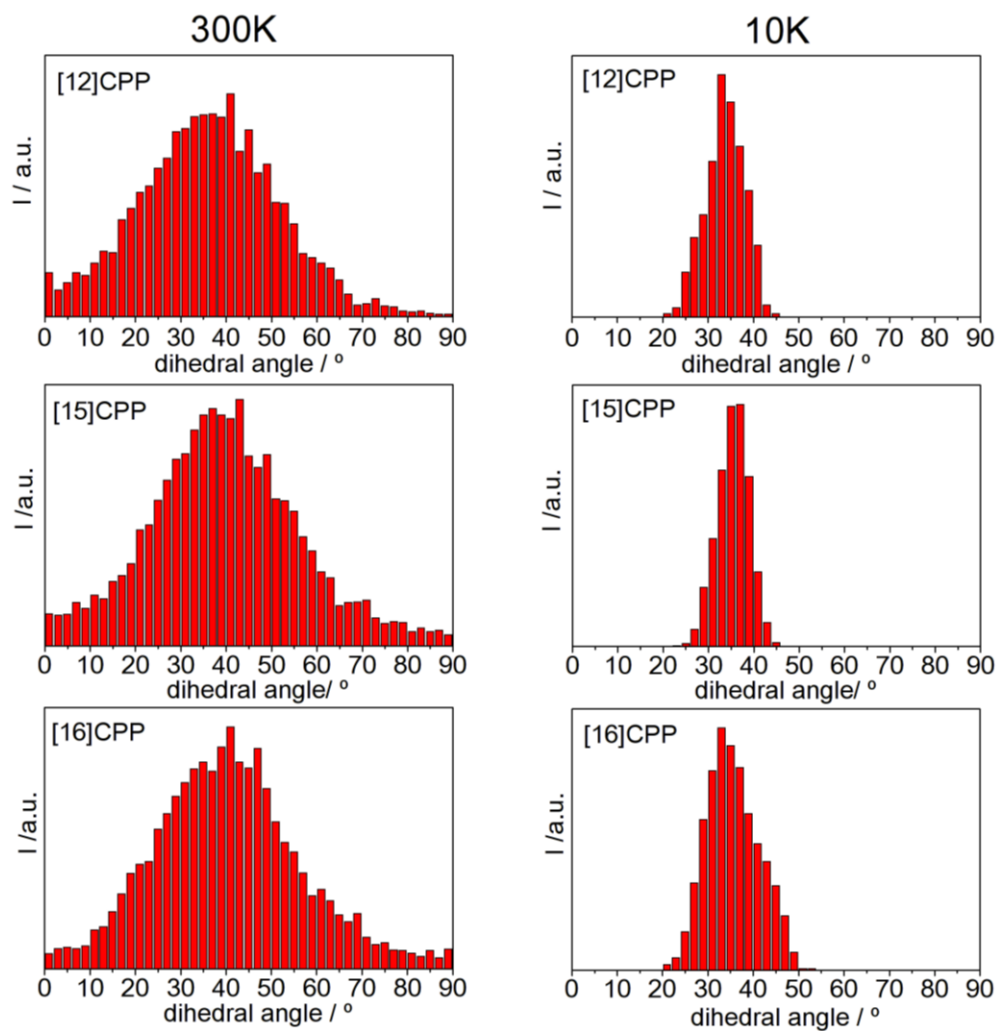

**Figure S3.** Variation in time of the dihedral angle distribution during the NEX-MD simulations at 300K and 10K for [n]CPP (n=12,15,16).

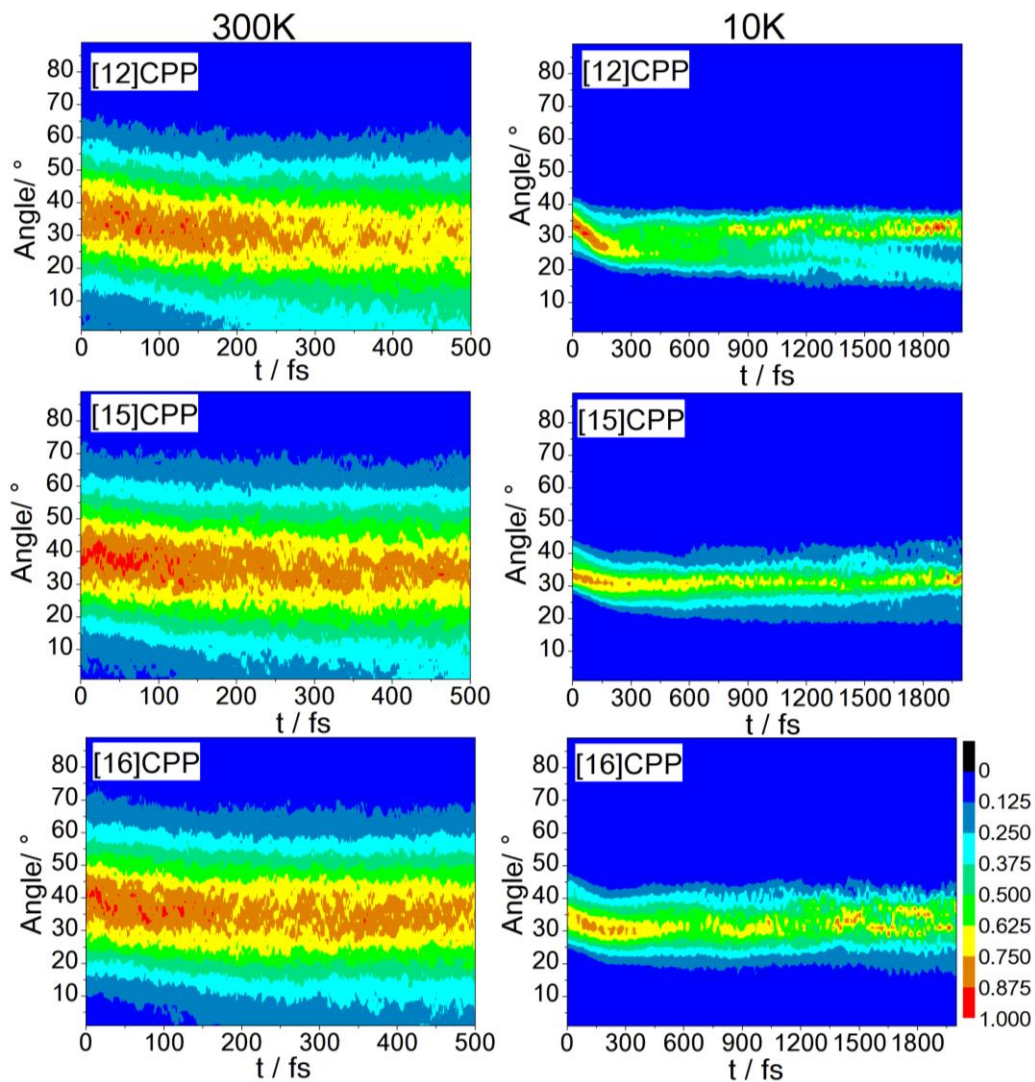

**Figure S4.** Variation in time of the relative probability for each ring to retain a significant contribution to total electronic transition density for [n]CPP (n=12,14,15,16) calculated during NEX-MD simulations at 300K

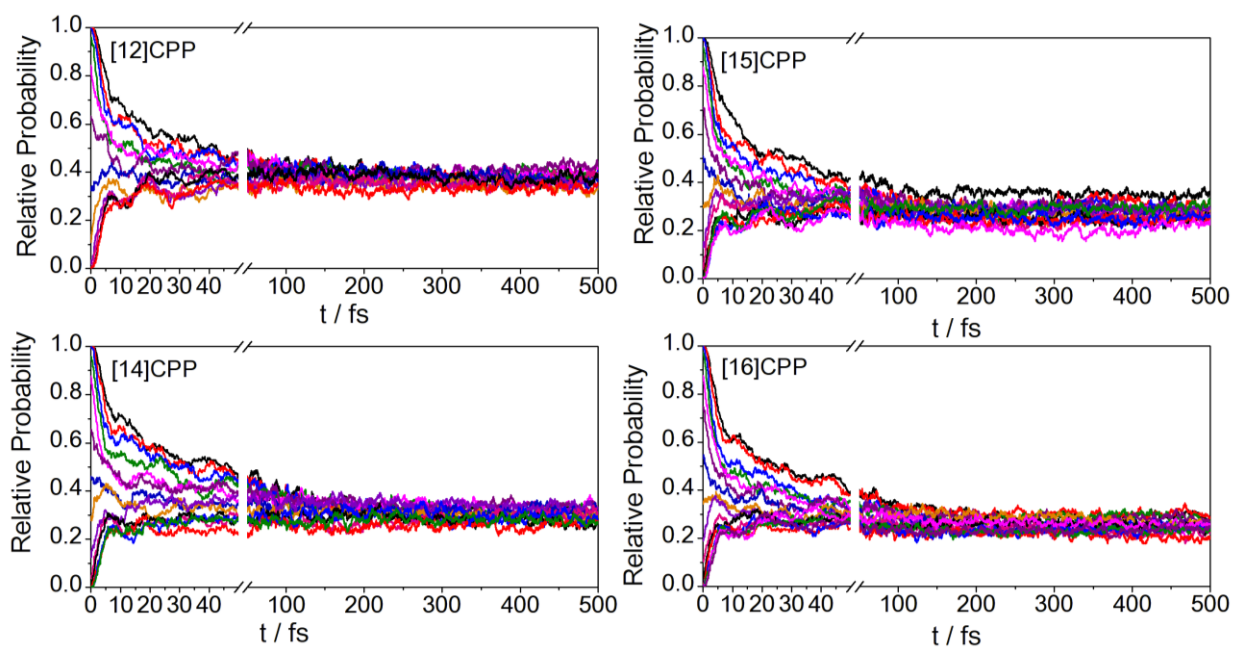

**Figure S5.** Variation in time of the relative probability for each ring to retain a significant contribution to total electronic transition density for [n]CPP(n=12,14,15,16)calculated duringadiabatic molecular dynamics on S1 state at 300K and 10K.

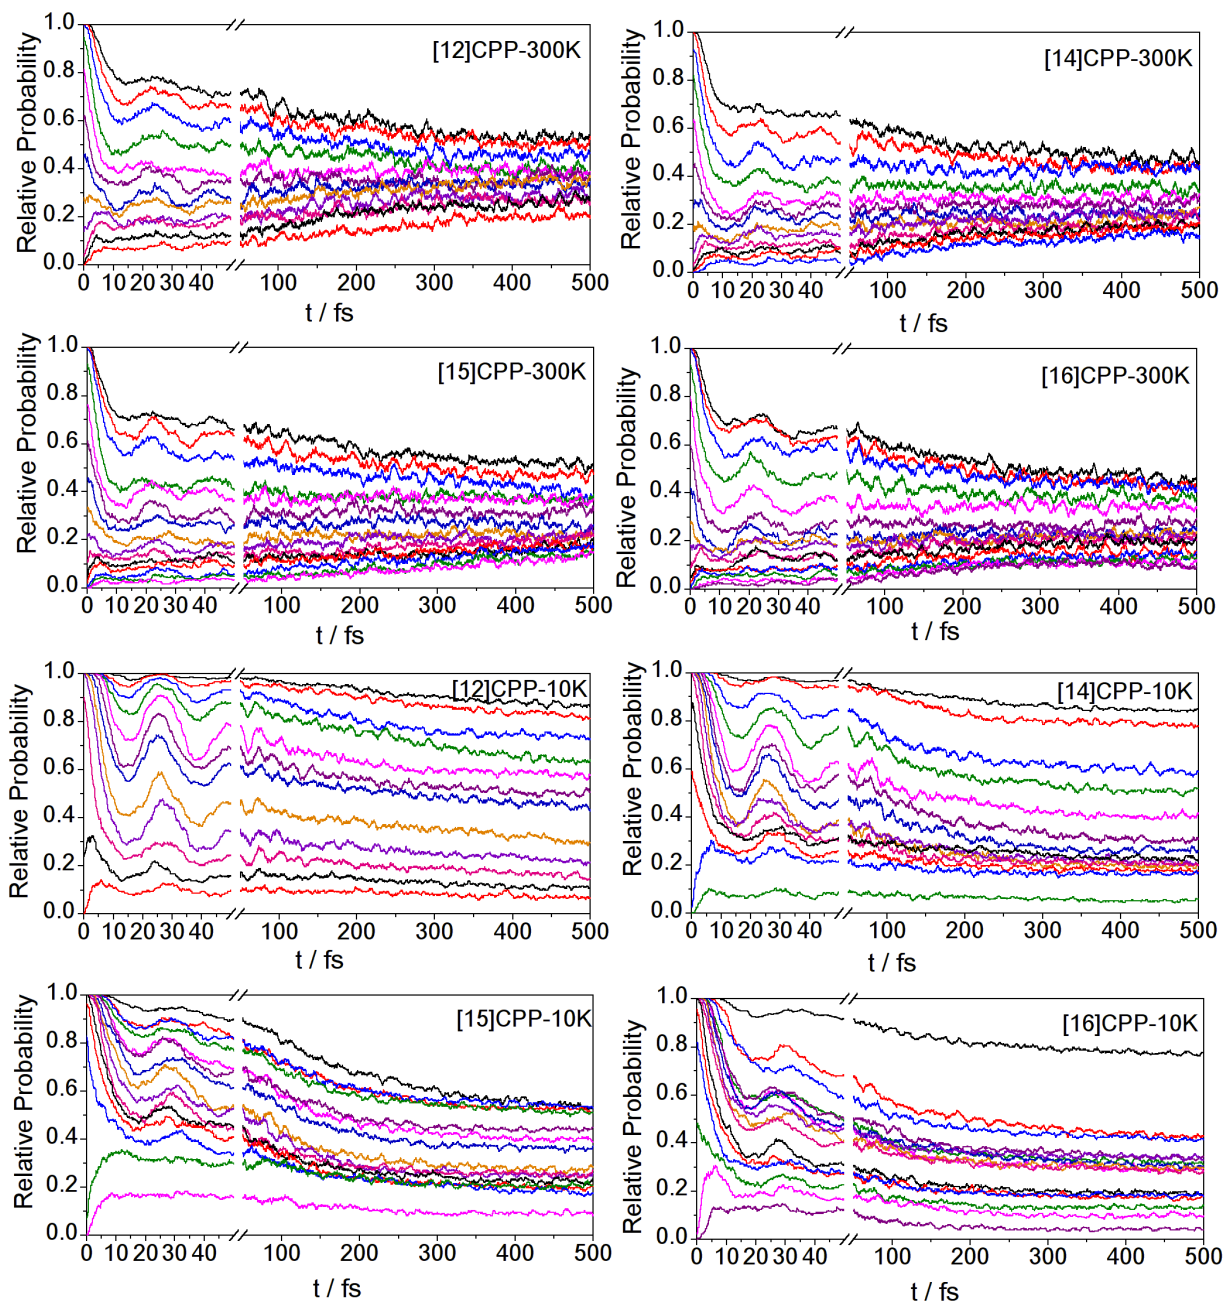

Supplement: c7cp06426h2.pdf [file c7cp06426h2.pdf]
